# Supplementary material for: Copper ion-selective fluorescent sensor using salicyl fluorone immobilized on a glutaraldehyde-coated eggshell membrane
Source: Royal Society of Chemistry journal article supplement (doi:10.1039/c5ay03068d), 2016-01-01
Supplement: c5ay03068d1.pdf [file c5ay03068d1.pdf]

## Electronic Supplementary Material

### Copper ion-Selective Fluorescent Sensor Using Salicyl Fluorone

#### Immobilized on Glutaraldehyde-Coated Eggshell Membrane

Anyi Wang, Ying Li, Taikun Wang, Shiping Wang

#### 1. Chemicals and reagents section

##### The preparation of copper standard stock solution

Copper standard stock solution was prepared by dissolving 0.380 g of copper nitrate ( $\text{Cu}(\text{NO}_3)_2 \cdot 3\text{H}_2\text{O}$ ) in water, and then diluting with water to a constant volume of 1000 mL. The concentration of standard stock solution was 1  $\mu\text{g}/\text{mL}$ , which could be diluted to proper concentrations of standard solution for further use.

##### The preparation of CPB solution

CPB solution was prepared by weighing 0.01 g of reagent to put in water, and dissolving under water bath heating at about 333 K, then diluting with water to a constant volume of 100 mL to make the concentration of 1 g/L.

##### The preparation of SAF solution

SAF solution was prepared by dissolving 0.336 g of SAF with absolute ethyl alcohol to a constant volume of 100 mL, and then storing away from light at 277 K for later use.

#### 2. results and discussion section

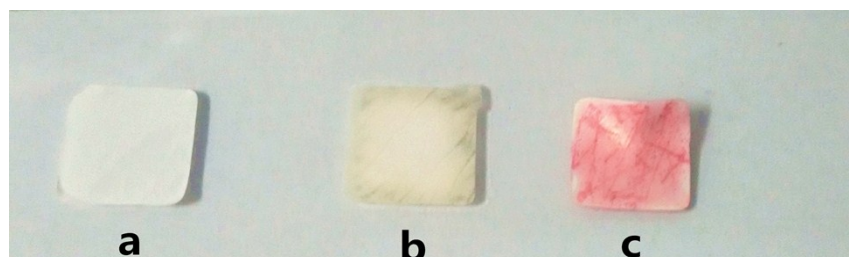

Fig. S1 The photo images of ESM (a), GA-ESM (b) and FSA/CPB-GA-ESM (c).

Table S1. Comparison between the developed method and previously reported ones

| Detection system                         | Reaction medium  | Linear range         | Detection limit | Real samples | Refs                 |
|------------------------------------------|------------------|----------------------|-----------------|--------------|----------------------|
| g-C <sub>3</sub> N <sub>4</sub>          | Aqueous solution | 0~10 <sup>4</sup> nM | 0.5 nM          | Water        | (Tian et al, 2013)   |
| Coumarin derivative molecular            | Aqueous solution | —                    | 87 nM           | Water        | (Carter et al, 2014) |
| rhodamine-based colorimetric chemosensor | Aqueous solution | 0.05–5.00 μM         | 10 nM           | Water        | (Xiang et al, 2008)  |
| Spiropyran Derivative                    | Solid matrix     | 0.75-36 nM           | 0.15 nM         | Water        | (Shao et al, 2005)   |
| SAF/CPB-GA-ESM                           | Solid matrix     | 5 ng/mL~500 μg/mL    | 0.5 ng/mL       | Water        | This work            |

J. Q. Tian, Q. Liu, A. M. Asiri, A. O. Al-Youbi and X. P. Sun, *Anal Chem*, 2013, **85**, 5595-5599.

K. P. Carter, A. M. Young and A. E. Palmer, *Chem Rev*, 2014, **114**, 4564-4601.

Y. Xiang, M. Li, X. T. Chen and A. J. Tong, *Talanta*, 2008, **74**, 1148-1153.

N. Shao, Y. Zhang, S. M. Cheung, R. H. Yang, W. H. Chan, T. Mo, K. A. Li and F. Liu, *Anal Chem*, 2005, **77**, 7294-7303.v
